# Supplementary material for: Numbers Written Counterclockwise in the Clock Drawing Test
Source: Atypon-hosted journal article supplement (doi:10.1176/appi.neuropsych.13030052), 2014-01-01
Supplement: E48_ds001.pdf [file E48_ds001.pdf]

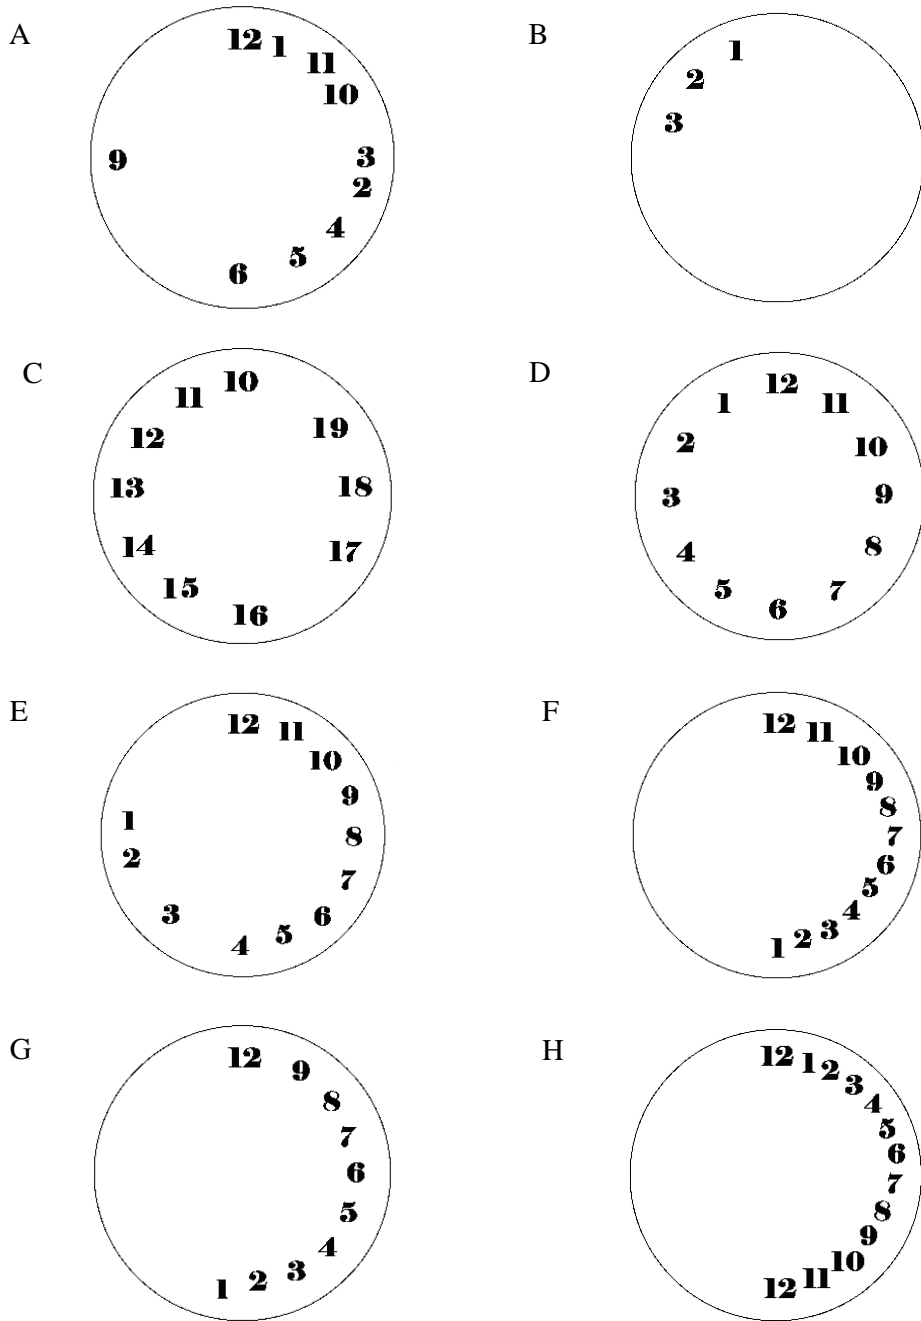

Representative clock-drawings:

- A. Incorrect number order
- B. Numbers written counterclockwise, <7 correctly-sequenced numbers
- C. Numbers written counterclockwise, >6 correctly-sequenced numbers
- D. Reversed clock phenomenon (RCP) with proper spatial arrangement
- E. RCP with poor spatial arrangement.
- F. Allochiria clock-drawing compatible with RCP
- G. Allochiria clock-drawing with numbers written counterclockwise, > 6 correctly-sequenced numbers
- H. Allochiria clock-drawing with correct number order
